# Supplementary material
Source: Springer Nature journal article supplement (https://www.springermedizin.de/resource/supplementary/12936_2013_2745_MOESM5_ESM.pdf/9544176)
Supplement: MOESM5 [file 9544176]

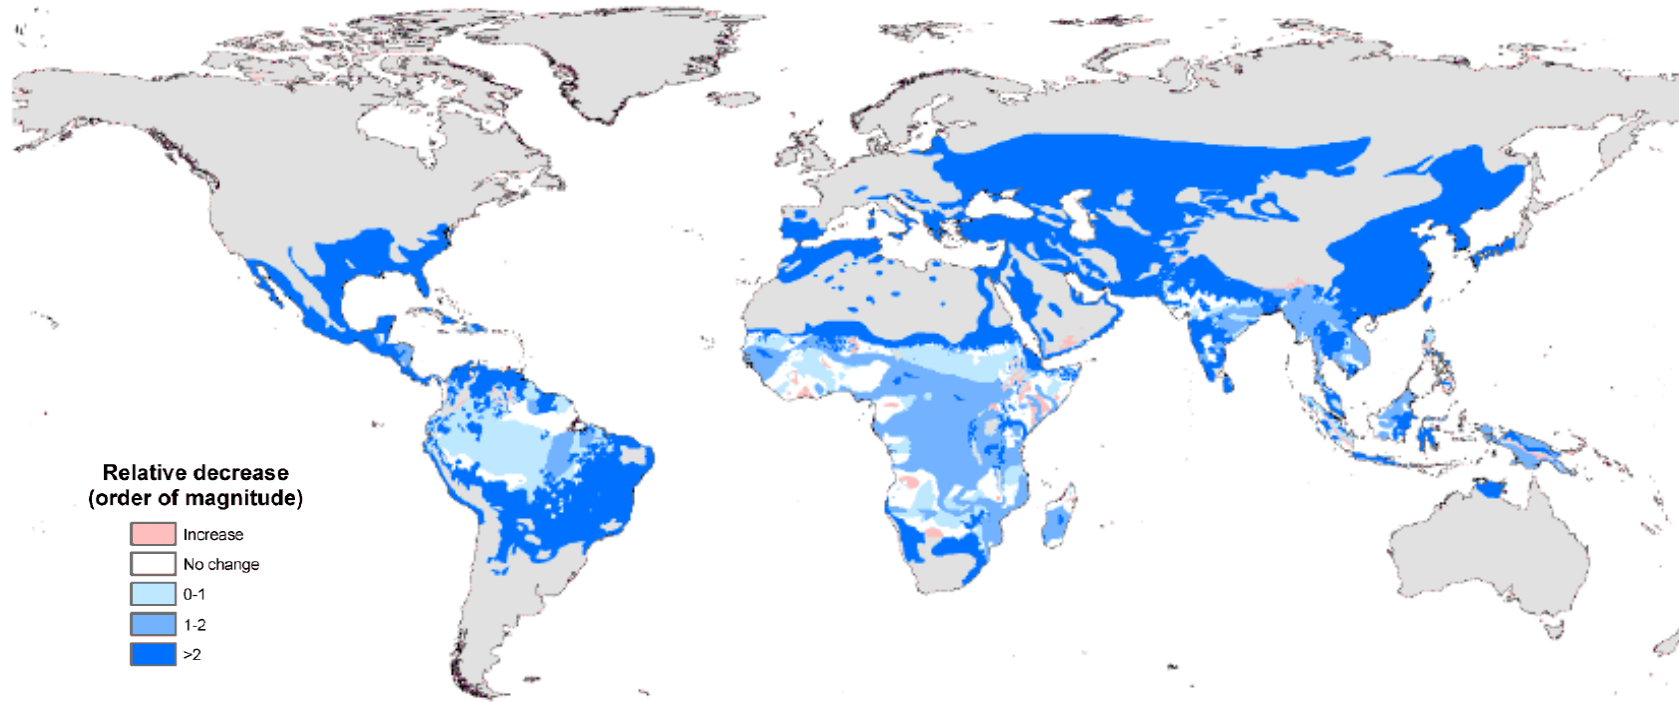

*The magnitude of decrease in *P. falciparum* basic reproductive number (PfPR), adapted from Gething et al [1].*

## Reference

1. Gething PW, Smith DL, Patil AP, Tatem AJ, Snow RW, Hay SI: **Climate change and the global malaria recession.** *Nature* 2010, **465**:342-346.
